# Supplementary material
Source: HighWire-hosted journal article supplement (https://bmjopenquality.bmj.com/content/11/4/e002057)
Supplement: inline-supplementary-material-1 [file inline-supplementary-material-1.pdf]

## Online Supplement

Table 1 More details on the papers included in the review (n=17) and their characteristics

| Author, year          | Country | Evaluation time (year) | Study method | Change intervention topic                                        | Approach to change | Framework/Model to have guided change                                         |
|-----------------------|---------|------------------------|--------------|------------------------------------------------------------------|--------------------|-------------------------------------------------------------------------------|
| Baker et al., 2019    | USA     | 4                      | QN           | Hospital acquired pneumonia prevention bundle                    | IP & CM            | The Quality Trilogy; The Influencer Model                                     |
| Flowers et al., 2016  | AUS     | 1.3                    | QL           | Intentional nursing rounding                                     | IP                 | Not included                                                                  |
| Flynn et al. 2019     | CAN     | 3                      | QL           | Lean implementation                                              | IP                 | Not included                                                                  |
| Hatlie et al. 2020    | USA     | 6                      | QL           | Patient and Family Advisory Councils on Quality and Safety Model | IP                 | Patient Safety Roadmap                                                        |
| McLean et al. 2017    | USA     | 2                      | QN           | Hand hygiene compliance                                          | IR                 | Plan-Do-Study-Act; Principles of reliability science                          |
| Mitchell et al. 2017  | USA     | 2.5                    | QL           | Re-Engineered Discharge                                          | IP                 | Not included                                                                  |
| Montague et al. 2019  | UK      | 2                      | QL           | Patient Safety Huddle                                            | IP                 | Not included                                                                  |
| Parand et al. 2012    | UK      | 1                      | QL           | the UK Safer Patients Initiative                                 | IR                 | Model for Improvement                                                         |
| Patel et al. 2017     | USA     | 1.3                    | QN           | Reduction in late-afternoon hospital discharges                  | IR                 | Model for Improvement                                                         |
| Porter et al. 2018    | USA     | 20                     | QL           | Fall prevention                                                  | IR                 | Not included                                                                  |
| Rohatgi et al. 2019   | USA     | 0.8                    | QN           | Delirium prevention                                              | IR                 | Plan-Do-Study-Act                                                             |
| Stolldorf et al. 2020 | USA     | 2                      | MX           | Medication reconciliation program                                | IR                 | Model for Evaluating Patient Safety Interventions                             |
| Pronovost et al. 2016 | USA     | 1                      | QN           | Improvement in the national quality indicators                   | IR                 | Individually developed four-phase model including Robust Process Improvement® |
| Knops et al. 2010     | NLD     | 7                      | Multi        | Best practice guidelines (fluid balance; body temperature)       | IP                 | A stepwise model for implementing changes                                     |
| Fleiszer et al. 2015  | CAN     | 7.5                    | QL           | Best practice guideline (nursing)                                | IP                 | Not included                                                                  |
| Fleiszer et al. 2016  | CAN     | 7.5                    | QL           | Best practice guideline (nursing)                                | IP                 | Not included                                                                  |
| Ford et al. 2014      | USA     | 5                      | MX           | Family-centred care                                              | IP                 | Not included                                                                  |

AUS: Australia; CAN: Canada; CM: Change management IP: Implementation; IR: Improvement; NR: Not reported; QL: Qualitative; QN: Quantitative; MX: Mixed methods; Multi: Multi methods; NLD: Netherlands

\*Fleiszer et al. 2015 and Fleiszer et al. 2016 are from the same study.
